# Supplementary material for: Environmental triggers of pemphigus vulgaris and bullous pemphigoid: a case control study
Source: PubMed Central journal article supplement (PMC11537152; doi:10.3389/fmed.2024.1441369), 2024-10-22
Supplement: Data_Sheet_1.pdf [file Data_Sheet_1.pdf]

**STRUCTURED QUESTIONNAIRE FOR ENVIRONMENTAL/OCCUPATIONAL TRIGGERS FOR PEMPHIGUS AND BULLOUS PEMPHIGOID**

- What is your Date of Birth (DD/MM/YY)?
- Sex (M/F)?
- What is your ethnic background? Please tick:

|                                              |  |                                                     |  |
|----------------------------------------------|--|-----------------------------------------------------|--|
| Australian Indigenous/Torres Strait Islander |  | South Asian (Bangladesh/India/Pakistani/Sri Lankan) |  |
| African                                      |  | Caucasian                                           |  |
| Hispanic/Latino/South America                |  | Pacific Islander/Polynesian                         |  |
| Asian                                        |  | African –American                                   |  |

If other – please specify:

- Are you of Jewish descent? Y/N  
If yes, are you of Ashkenazi descent? (Y/N)
- Are you of Muslim descent?  
If yes, are you of:
  - Suni descent:
  - Shiite descent:
  - Other: Please specify
- What is your current Occupation/Job (if applicable)?

**A. SMOKING**

**a.1** Do you smoke or have you smoked in the past? (Y/N)  
If no, please proceed to section B

If yes,

**a.2 (i)** How old were you when you started smoking?

**a.2 (ii)** Do you smoke any of the following?

|              |  |           |  |
|--------------|--|-----------|--|
| Cigars       |  | Marijuana |  |
| Pipe Smoking |  |           |  |

**a.3** How many years have you smoked for (please tick)?

|             |  |             |  |
|-------------|--|-------------|--|
| 0-5 years   |  | 15-25 years |  |
| 6-10 years  |  | >25 years   |  |
| 11-15 years |  |             |  |

**a.4** How many cigarettes do you smoke on an average daily basis?

|       |  |       |  |
|-------|--|-------|--|
| 0-5   |  | 16-25 |  |
| 6-10  |  | 26-50 |  |
| 11-15 |  | >50   |  |

## **B. OCCUPATIONAL EXPOSURES**

**b.1** Please list your occupational (work) history from current job to first job:

- Current job (no of years worked):
- Previous jobs(no of years worked):
- Casual jobs

**b.2** Do you believe that your current or previous jobs played a role in developing or triggering skin diseases (Y/N)

**b.3** Are you exposed to pesticides as part of your current or previous job? (Y/N)

If yes:

- For how many years do/did you use pesticides)?

|           |  |            |  |
|-----------|--|------------|--|
| 0-1 years |  | 6-15 years |  |
| 1-5 years |  | >15 years  |  |

- What type of pesticides were you exposed to? (please tick)

|           |  |                           |  |
|-----------|--|---------------------------|--|
| DDT       |  | Dioxins                   |  |
| PCBs      |  | Diazinon                  |  |
| Chlordane |  | Chlorpyrifos<br>(Dursban) |  |
| PCP       |  | Other                     |  |

If you answered other – what was the name of the pesticide(s) you were exposed (if possible):

- How often do (did) you use pesticides at work (frequency): (please tick)

|                 |  |                   |  |
|-----------------|--|-------------------|--|
| Daily           |  | Fortnightly       |  |
| daily to weekly |  | Monthly           |  |
| Weekly          |  | less than monthly |  |

- Do you wear personal protective equipment (PPE) when handling pesticides (Y/N)?

If yes – please specify:

|           |  |        |  |
|-----------|--|--------|--|
| Rarely    |  | Mostly |  |
| Sometimes |  | Always |  |

**b.4** Are you exposed to the following heavy metals as part of your current or previous job? (please tick)

|          |  |           |  |
|----------|--|-----------|--|
| Cadmium  |  | Mercury   |  |
| Nickel   |  | Beryllium |  |
| Lead     |  | Arsenic   |  |
| Chromium |  | Iron      |  |

If yes:

- How were you exposed to this metal(s)?

|                |  |              |  |
|----------------|--|--------------|--|
| Direct contact |  | Vapour/fumes |  |
|----------------|--|--------------|--|

- When and/or for how many years were you exposed to these metals?

|           |  |            |  |
|-----------|--|------------|--|
| 0-1 years |  | 6-15 years |  |
| 1-5 years |  | >15 years  |  |

- Did you wear personal protective equipment when handling these metals?

If yes please specify:

|           |  |        |  |
|-----------|--|--------|--|
| Rarely    |  | Mostly |  |
| Sometimes |  | Always |  |

**b.5** Have you been exposed to the following organic products as part of your current or previous occupation/s? (please tick)

|                 |  |               |  |
|-----------------|--|---------------|--|
| Grass clippings |  | Compost       |  |
| Crops           |  | Animal manure |  |

If yes:

- How were you exposed to these substances?

|                |  |              |  |
|----------------|--|--------------|--|
| Direct contact |  | Vapour/fumes |  |
|----------------|--|--------------|--|

- When and how for how many years were you exposed to these substances?

|           |  |            |  |
|-----------|--|------------|--|
| 0-1 years |  | 6-15 years |  |
| 1-5 years |  | >15 years  |  |

- Did you wear personal protective equipment when handling these substances?  
(if yes please specify)

|           |  |        |  |
|-----------|--|--------|--|
| Rarely    |  | Mostly |  |
| Sometimes |  | Always |  |

**b.6** Have you been exposed to the following substances as part of your current or previous occupations? (please tick)

|                        |  |                          |  |
|------------------------|--|--------------------------|--|
| Grease or grease traps |  | General rubbish or waste |  |
| Oil                    |  | Asbestos                 |  |
| Petroleum              |  | Latex                    |  |

If yes:

- How were you exposed to these substances?

|                |  |              |  |
|----------------|--|--------------|--|
| Direct contact |  | Vapour/fumes |  |
|----------------|--|--------------|--|

- How many years were you exposed to these substances?

|           |  |            |  |
|-----------|--|------------|--|
| 0-1 years |  | 6-15 years |  |
| 1-5 years |  | >15 years  |  |

- Did you wear personal protective equipment when handling these substances?  
If yes – please specify:

|           |  |        |  |
|-----------|--|--------|--|
| Rarely    |  | Mostly |  |
| Sometimes |  | Always |  |

**b.7** If you had pre-existing skin disease, do you believe your current or previous occupation exacerbate or worsen your symptoms?

|     |  |    |  |
|-----|--|----|--|
| Yes |  | No |  |
|-----|--|----|--|

## **C. OTHER ENVIRONMENTAL TRIGGERS**

**c.1** Have you travelled overseas to the following regions?

|             |  |               |  |
|-------------|--|---------------|--|
| Middle East |  | South America |  |
| Africa      |  | Europe        |  |

If yes,

- Which country?
- When?

If answered: Brazil or Columbia – please proceed to c.2

All others proceed to c.3

**c.2** Brazil/Columbia:

- Did you travel to rural areas of Brazil or Columbia (Y/N)
- Were you exposed to black fly insects (Diptera: Simulium) whilst in this country? (Y/N)

**c.3** Does your diet contain daily consumption of any one of the following foodstuffs: (please tick)

|               |  |                       |  |
|---------------|--|-----------------------|--|
| Garlic        |  | Artificial sweeteners |  |
| Leeks         |  | Cinnamon spices       |  |
| Mustard seeds |  | Mangoes               |  |
| Mustard oil   |  | Nuts with shells      |  |
| Celery        |  | Tomatoes              |  |

**c.4**

Do you have daily consumption of the following hot drinks? (please tick)

|                   |  |                  |  |
|-------------------|--|------------------|--|
| Coffee            |  | Green/Herbal Tea |  |
| Tea (traditional) |  | Hot chocolate    |  |

If yes, how many times a day would you drink?

|   |  |    |  |
|---|--|----|--|
| 1 |  | 4  |  |
| 2 |  | >4 |  |
| 3 |  |    |  |

Do you have daily consumption of the following cold drinks (please tick)

|                          |  |                   |  |
|--------------------------|--|-------------------|--|
| Colas                    |  | Iced coffee       |  |
| Diet Colas               |  | Other soft drinks |  |
| Red Bull or V or similar |  | Iced tea          |  |

If yes, how many times a day would you drink?

|   |  |    |  |
|---|--|----|--|
| 1 |  | 4  |  |
| 2 |  | >4 |  |
| 3 |  |    |  |

**c.5** What regular medications are you currently taking?

**c.6** Are you currently on the following hormonal medications or supplements:

|                         |  |                        |  |
|-------------------------|--|------------------------|--|
| Oral contraceptive pill |  | HRT                    |  |
| Estrogen                |  | None                   |  |
| Testosterone            |  | Other (please specify) |  |

HRT = Hormone replacement therapy

**c.7** If you are a female, have you been pregnant before? (Y/N)

**c.8** Are you taking any alternative medicines or vitamins (please tick)

|               |  |                               |  |
|---------------|--|-------------------------------|--|
| Multivitamins |  | Algae Spirulina<br>Platenesis |  |
| Glucosamine   |  | Gingko Biloba                 |  |
| Fish Oil      |  | Calcium supplements           |  |
| Echinacae     |  | Other                         |  |

If you answered other, please indicate what type of vitamin/supplement:

**c.9** Have you been vaccinated for the following diseases? Please tick and indicate when if possible

|              |  |                                            |  |
|--------------|--|--------------------------------------------|--|
| Rabies       |  | Cervical cancer<br>vaccine                 |  |
| Yellow Fever |  | Tetanus (when was<br>last known booster?): |  |
| Tuberculosis |  | Diphtheria                                 |  |
| Anthrax      |  | Heptatitis B                               |  |

**c.10** How often do you drink alcohol? (please tick)

|                           |  |              |  |
|---------------------------|--|--------------|--|
| Never                     |  | Weekly       |  |
| Less than once<br>monthly |  | Twice weekly |  |
| Monthly                   |  | Daily        |  |
| Fortnightly               |  |              |  |

If you drink alcohol, how many drinks do you have when you do drink? (please tick)

|     |  |      |  |
|-----|--|------|--|
| 1   |  | 6-10 |  |
| 2   |  | >10  |  |
| 3-5 |  |      |  |

|  |  |  |  |  |  |
|--|--|--|--|--|--|
|  |  |  |  |  |  |
|--|--|--|--|--|--|

**c.11** How much exposure to sunlight do you have on an average day? (please tick)

|                           |  |                        |  |
|---------------------------|--|------------------------|--|
| Less than 30 min          |  | Between 5 and 8 hours  |  |
| Between 30 min and 1 hour |  | Between 8 and 12 hours |  |
| Between 1 and 2 hours     |  | Greater than 12 hours  |  |
| Between 2 and 5 hours     |  |                        |  |

**c.12** When was the last time you had a sunburn?

➤ How many episodes of lifetime sunburn episodes have you had?

|             |  |                                            |  |
|-------------|--|--------------------------------------------|--|
| None        |  | 11-15                                      |  |
| Less than 3 |  | >15                                        |  |
| 3-5         |  | Every year I get several sunburns          |  |
| 6-10        |  | I can't go outside without getting sunburn |  |

**c.13** Were you been exposed to high levels of mental stress in the past 12 months? (Y/N)

If yes, please tick the following stressful event and indicate when this occurred?

|                               |  |                    |  |
|-------------------------------|--|--------------------|--|
| Loss of job                   |  | Divorce/separation |  |
| Loss of spouse/partner        |  | Migration          |  |
| Loss of close relative/friend |  | Workplace stress   |  |
| Financial difficulty          |  | Other              |  |

If you ticked other – please specify:

How would you describe the level of stress you were under? (please tick)

|                                          |  |       |  |
|------------------------------------------|--|-------|--|
| Extreme – needed hospitalisation         |  | Mild  |  |
| Severe – needed medications/medical help |  | Minor |  |
| Moderate                                 |  |       |  |

**c.14** Do you engage in the following hobbies?

|           |  |                     |  |
|-----------|--|---------------------|--|
| Gardening |  | Tinkering with cars |  |
| Fishing   |  | Sports              |  |

If yes to sports: what type of sport do you play?

If yes to any of the above, how many hours per week do you engage in the above?

|       |  |        |  |
|-------|--|--------|--|
| 0-1   |  | >10-15 |  |
| >1-2  |  | >15-25 |  |
| >2-5  |  | >25    |  |
| >5-10 |  |        |  |

**c.15** Do you clean your house yourself? (Y/N)

if yes:

➤ Do you wear gloves? (please tick)

|       |  |              |  |       |  |        |  |
|-------|--|--------------|--|-------|--|--------|--|
| Never |  | Occasionally |  | Often |  | Always |  |
|-------|--|--------------|--|-------|--|--------|--|

➤ How many hours per week do you clean your house?

|       |  |        |  |
|-------|--|--------|--|
| 0-1   |  | >10-15 |  |
| >1-2  |  | >15-25 |  |
| >2-5  |  | >25    |  |
| >5-10 |  |        |  |

➤ What type of products do you use?

|                                                     |  |                            |  |
|-----------------------------------------------------|--|----------------------------|--|
| Bleach                                              |  | Lime                       |  |
| Degreasants                                         |  | Household Pesticides       |  |
| Soap                                                |  | Dish washing<br>Detergents |  |
| Commercial household<br>cleaners (e.g Mr<br>Muscle) |  | Other                      |  |

If you ticked other, please specify

**c.16**

➤ Do you usually take showers or baths? Or both equally?

➤ How often to do you take a shower/bath?

|                             |  |                       |  |
|-----------------------------|--|-----------------------|--|
| Less than every two<br>days |  | Twice daily           |  |
| Every two days              |  | More than twice daily |  |
| Daily                       |  |                       |  |

➤ If bath, list what you usually use in the bath?

➤ Do you use hair dye?

○ If so: How long have you used hair dye?

➤ What types of shampoo do you use?



|                     |  |                                 |  |
|---------------------|--|---------------------------------|--|
| Commercial shampoos |  | Shampoo plus conditioner in one |  |
| Tar based shampoos  |  | Oil                             |  |
| Medicated shampoos  |  | Other                           |  |

If other – please specify

**c.17** How often do you brush your teeth?

|                          |  |                       |  |
|--------------------------|--|-----------------------|--|
| Less than every two days |  | Twice daily           |  |
| Every two days           |  | Thrice daily          |  |
| Daily                    |  | More than 3 times/Day |  |

What kind of toothpaste do you use?

**c.18** Have you had any dental work done please tick?

|                                                |  |                 |  |
|------------------------------------------------|--|-----------------|--|
| Fillings                                       |  | Braces          |  |
| Root canal                                     |  | Teeth whitening |  |
| Crowned teeth                                  |  | Other           |  |
| Major hospital based surgery (i.e. to the jaw) |  |                 |  |

If you ticked other – please specify:

➤ If you ticked yes to fillings, what type of fillings do you have?

|                  |  |       |  |
|------------------|--|-------|--|
| Gold             |  | Glass |  |
| Mercury + Silver |  | Resin |  |
| Ceramic          |  | Other |  |

If you ticked other please specify?

**c.19**

Do you use mouthwash regularly (Y/N)

Do you floss your teeth regularly (Y/N)

**THANK YOU FOR PARTICIPATING IN THIS SURVEY AND CONTRIBUTING TO ONGOING BLISTERING DISEASE RESEARCH**
